# Supplementary material for: Towards a Maturity Model for IoT Adoption by B2C Companies
Source: MDPI journal article supplement (doi:10.3390/app12030982), 2022-01-18
Supplement: s1 [file s1]

Archive with 1 entries (1 files):
- applsci-1458267-Supplementary.pdf
